# Supplementary material
Source: Springer Nature journal article supplement (https://www.springermedizin.de/resource/supplementary/12891_2009_776_MOESM1_ESM.pdf/9506986)
Supplement: MOESM1 [file 9506986]

Patients referred from primary care after four weeks of treatment followed by four weeks of back school and group exercise at backcenter, N = 151

Baseline measurements  
and determination of  
eligibility

Randomization  
N = 136

Group A  
Supervised Nordic  
Walking in groups  
n = 45

Group B  
Non-supervised  
Nordic Walking  
n = 46

Group C  
Encouragement to  
remain active  
n = 45

5

4

1

10 weeks follow up: Questionnaires, return activity diary, return accelerometer N = 136

26 week follow up: Questionnaires

52 week follow up: Questionnaires
